# Supplementary material for: Utility, Value, and Benefits of Contemporary Personal Health Records: Integrative Review and Conceptual Synthesis
Source: PubMed Central journal article supplement (PMC8120425; doi:10.2196/26877), 2021-04-29
Supplement: jmir_v23i4e26877_app1.pdf [file jmir_v23i4e26877_app1.pdf]

## Appendix 1: Examples of Personal Health Record (PHR) Use-Cases in the Healthcare Delivery Value Chain

| Healthcare Delivery Value Chain Activities   |                                                                                                                                                                                                 |                                                                                                                                                                                        |                                                                                                                                           |                                                                                                                                |                                                                                                                                                                                                                                                                                            |                                                                                                                                                                                          |
|----------------------------------------------|-------------------------------------------------------------------------------------------------------------------------------------------------------------------------------------------------|----------------------------------------------------------------------------------------------------------------------------------------------------------------------------------------|-------------------------------------------------------------------------------------------------------------------------------------------|--------------------------------------------------------------------------------------------------------------------------------|--------------------------------------------------------------------------------------------------------------------------------------------------------------------------------------------------------------------------------------------------------------------------------------------|------------------------------------------------------------------------------------------------------------------------------------------------------------------------------------------|
|                                              |                                                                                                                                                                                                 |                                                                                                                                                                                        |                                                                                                                                           |                                                                                                                                |                                                                                                                                                                                                                                                                                            |                                                                                                                                                                                          |
| PHR Features and Functions                   |                                                                                                                                                                                                 |                                                                                                                                                                                        |                                                                                                                                           |                                                                                                                                |                                                                                                                                                                                                                                                                                            |                                                                                                                                                                                          |
| <b>Personal Health Information Resources</b> | <ul style="list-style-type: none"> <li>Keeping patient diaries</li> <li>Referencing educational resources</li> <li>Recording self-exams</li> </ul>                                              | <ul style="list-style-type: none"> <li>Reviewing patient self-reported data</li> </ul>                                                                                                 | <ul style="list-style-type: none"> <li>Referencing educational resources</li> </ul>                                                       |                                                                                                                                | <ul style="list-style-type: none"> <li>Keeping patient diaries</li> <li>Referencing educational resources</li> <li>Recording self-exams</li> </ul>                                                                                                                                         | <ul style="list-style-type: none"> <li>Keeping patient diaries</li> <li>Referencing educational resources</li> <li>Recording self-exams</li> </ul>                                       |
| <b>Patient and Provider Records</b>          | <ul style="list-style-type: none"> <li>Reviewing medical history</li> </ul>                                                                                                                     | <ul style="list-style-type: none"> <li>Reviewing medical history</li> <li>Updating PMRI</li> <li>Maintaining CCR</li> </ul>                                                            | <ul style="list-style-type: none"> <li>Reviewing medical history</li> </ul>                                                               | <ul style="list-style-type: none"> <li>Reviewing medical history</li> <li>Updating PMRI</li> <li>Maintaining CCR</li> </ul>    | <ul style="list-style-type: none"> <li>Updating PMRI</li> <li>Maintaining CCR</li> </ul>                                                                                                                                                                                                   | <ul style="list-style-type: none"> <li>Reviewing medical history</li> <li>Maintaining CCR</li> </ul>                                                                                     |
| <b>Health Monitoring Tools</b>               | <ul style="list-style-type: none"> <li>Tracking lifestyle health data</li> <li>Availing medical device data</li> <li>Responding to health alerts &amp; notifications</li> </ul>                 | <ul style="list-style-type: none"> <li>Responding to health alerts &amp; notifications</li> <li>Availing medical device data</li> </ul>                                                | <ul style="list-style-type: none"> <li>Tracking lifestyle health data</li> <li>Availing medical device data</li> </ul>                    |                                                                                                                                | <ul style="list-style-type: none"> <li>Tracking lifestyle health data</li> <li>Availing medical device data</li> <li>Responding to health alerts &amp; notifications</li> </ul>                                                                                                            | <ul style="list-style-type: none"> <li>Tracking lifestyle health data</li> <li>Availing medical device data</li> <li>Responding to health alerts &amp; notifications</li> </ul>          |
| <b>Contact and Communication Features</b>    | <ul style="list-style-type: none"> <li>Availing reminders &amp; appointments for regular checkups</li> <li>Connecting with specialists for early referrals</li> </ul>                           | <ul style="list-style-type: none"> <li>Accessing diagnosis consultations &amp; follow-ups</li> <li>Requisitioning lab tests</li> <li>Reporting remote monitoring data</li> </ul>       | <ul style="list-style-type: none"> <li>Consulting with designated clinicians</li> </ul>                                                   | <ul style="list-style-type: none"> <li>Counselling from attending physicians</li> <li>Ensuring treatment compliance</li> </ul> | <ul style="list-style-type: none"> <li>Counselling from attending clinicians</li> <li>Availing reminders &amp; appointments for follow-ups</li> <li>Acquiring prescription refills</li> <li>Connecting with specialists for referrals</li> <li>Reporting remote monitoring data</li> </ul> | <ul style="list-style-type: none"> <li>Availing reminders &amp; appointments for follow-ups</li> <li>Acquiring prescription refills</li> <li>Reporting remote monitoring data</li> </ul> |
| <b>Shared Access and Social Networks</b>     | <ul style="list-style-type: none"> <li>Assessing family medical history</li> <li>Seeking information from online forums</li> <li>Receiving social support from online communities</li> </ul>    | <ul style="list-style-type: none"> <li>Obtaining second opinions online</li> <li>Assessing family medical history</li> <li>Contributing to crowdsourced illness data</li> </ul>        | <ul style="list-style-type: none"> <li>Receiving social support from online communities</li> </ul>                                        |                                                                                                                                | <ul style="list-style-type: none"> <li>Receiving social support from online communities</li> </ul>                                                                                                                                                                                         | <ul style="list-style-type: none"> <li>Seeking information from online forums</li> <li>Contributing to crowdsourced illness data</li> </ul>                                              |
| <b>Decision Support Functions</b>            | <ul style="list-style-type: none"> <li>Consulting with specialists</li> <li>Counselling from experts about future risks</li> <li>Availing early health warnings &amp; CDS advisories</li> </ul> | <ul style="list-style-type: none"> <li>Reviewing health risk profiles</li> <li>Recommending treatment alternatives</li> <li>Checking drug-drug or drug-allergy interactions</li> </ul> | <ul style="list-style-type: none"> <li>Reviewing health risk profiles</li> <li>Checking drug-drug or drug-allergy interactions</li> </ul> | <ul style="list-style-type: none"> <li>Developing tailored interventions</li> </ul>                                            | <ul style="list-style-type: none"> <li>Consulting with specialists</li> <li>Developing tailored interventions</li> <li>Resolving treatment side-effects</li> </ul>                                                                                                                         | <ul style="list-style-type: none"> <li>Counselling from experts about long-term care</li> <li>Availing early health warnings &amp; CDS advisories</li> </ul>                             |
